# Supplementary material for: Study of Fermentation Strategies by Lactobacillus gasseri for the Production of Probiotic Food Using Passion Fruit Juice Combined with Green Tea as Raw Material
Source: MDPI journal article supplement (doi:10.3390/foods11101471), 2022-05-18

**Figure S1.** Monitoring of pH (A), total titratable purity (B) and soluble solids (C) during fermentation by *L. gasseri* in passion fruit juice.

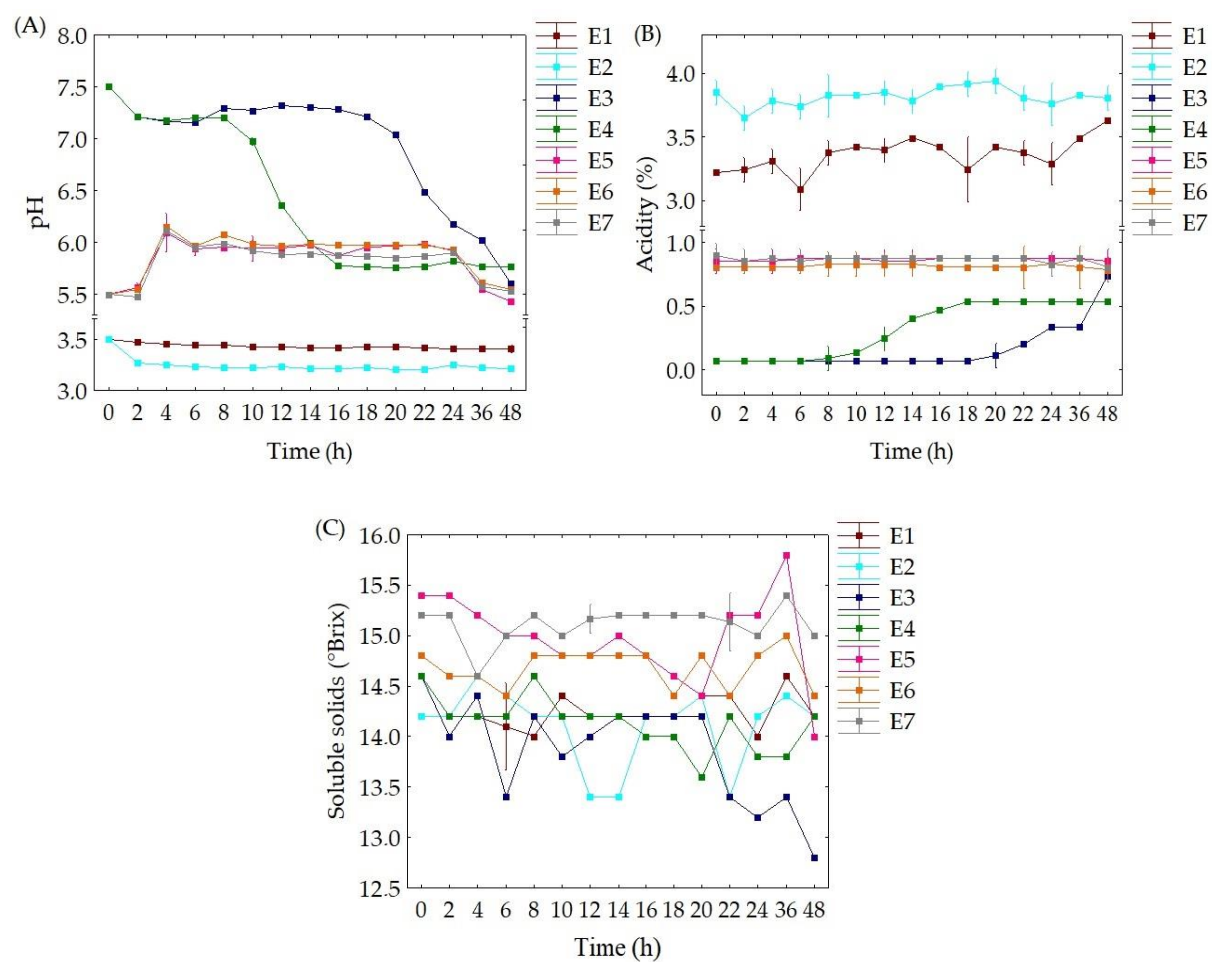

**Figure S2.** Monitoring of pH (A), total titratable acidity (B) and soluble solids (C) during fermentation by *L. gasseri* in passion fruit juice.

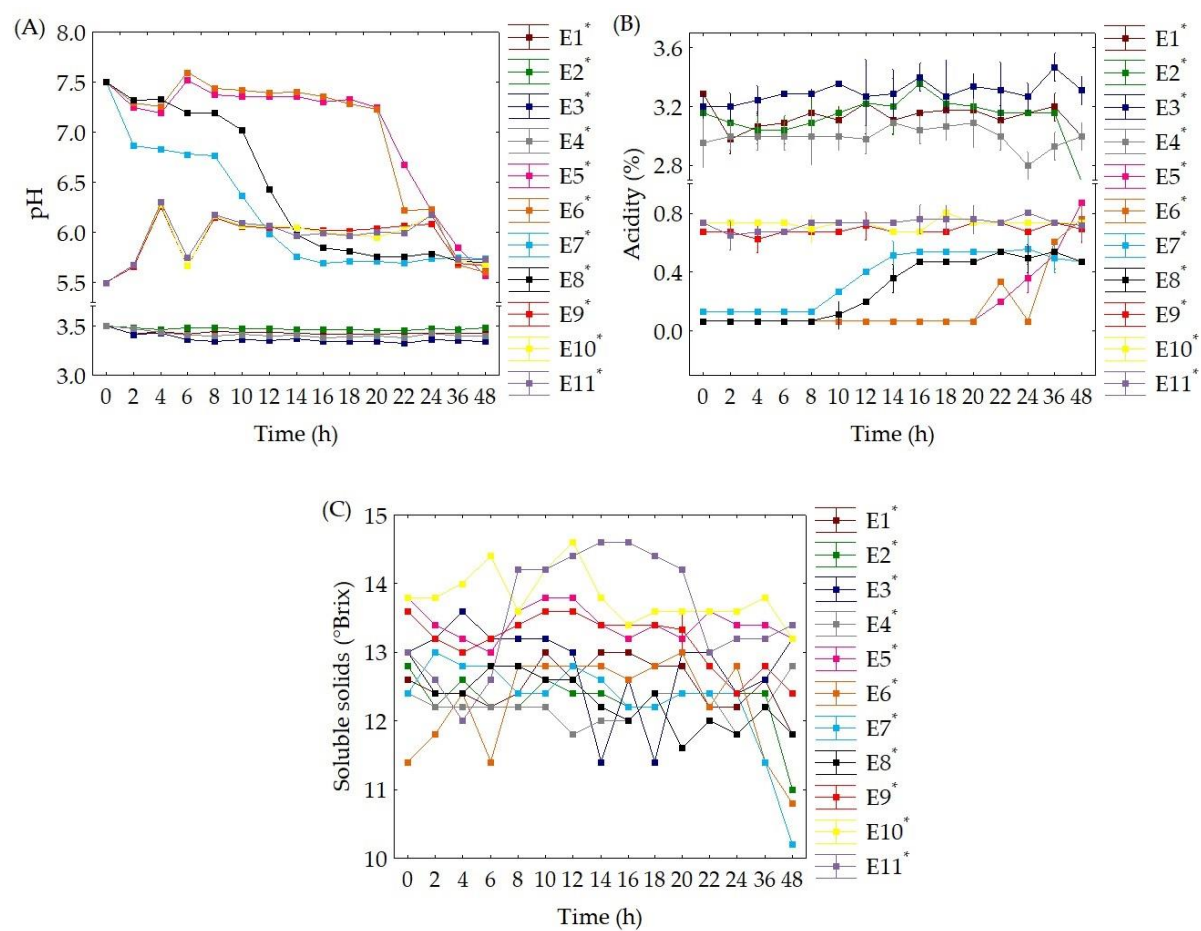

Supplement: s1 [file s1]
